1 ***Hemodynamic evaluation of chemical mediators of sepsis during systemic***  
2 ***inflammatory response in an experimental animal model***

3 Guilherme de Souza Vieira<sup>1\*</sup>, Fernanda Antunes<sup>1¶</sup>, Josias Alves Machado<sup>2¶</sup>, Isabella  
4 Cristina Morales<sup>2&</sup>, Priscilla Olivieri Benck de Jesus<sup>1¶</sup>, Alexandra de Faria do  
5 Amaral<sup>1&</sup>, André Lacerda de Abreu Oliveira<sup>2¶</sup>;

6 <sup>1</sup> Laboratory of Physiology and Experimental Pharmacology of the Unit of Animal  
7 Experimental, Universidade Estadual do Norte Fluminense Darcy Ribeiro, Campos dos  
8 Goytacazes, Rio de Janeiro, Brazil

9 <sup>2</sup> Laboratory of Complex Surgerys of the Unit of Animal Experimental, Universidade  
10 Estadual do Norte Fluminense Darcy Ribeiro, Campos dos Goytacazes, Rio de Janeiro,  
11 Brazil

12 \*Corresponding author

13 E-mail: [guilhermesv.medvet@gmail.com](mailto:guilhermesv.medvet@gmail.com) (VIEIRA, G.)

14 ¶ These authors contributes equally to this work

15 & These authors also contributes equally to this work

16

17

18

19

20

21

## 22 **Abstract**

23 The early diagnosis of sepsis increases the chances of its successful treatment.  
24 Biomarkers are able to distinguish between systemic inflammatory response syndrome  
25 and sepsis and are used to monitor pro- and anti-inflammatory changes associated with  
26 the host response to pathogens. A total of 11 rats underwent sepsis induction and  
27 measured systolic, diastolic and mean arterial blood pressure. Leukocyte counts,  
28 procalcitonin, and nitric oxide also were measured 0, 2, and 4 hours after the induction  
29 of sepsis using the cecal ligation and puncture method. The animals were divided into  
30 two groups: control (SHAM) and induced. Procalcitonin levels remained within the  
31 normal range for an inflammatory response throughout the experiment. There was a  
32 statistically insignificant increase in nitric oxide levels. All animals showed increased  
33 diastolic arterial blood pressure; however, the increase in the induced animals was even  
34 more pronounced. Procalcitonin and nitric oxide levels can increase due to surgical  
35 manipulation, while arterial blood pressure was not a good predictor for the onset of  
36 sepsis during the time period studied here.

## 37 **Introduction**

38 Sepsis is a syndrome caused by an uncontrolled systemic inflammatory response  
39 of the individual that is of bacterial, fungal, or viral origin. If not treated promptly,  
40 sepsis progresses to septic shock, which is characterized by severe depletion of  
41 intravascular volume and cellular hypoxia and can lead to multiple organ failure and  
42 death [1].

43 With a mortality rate of 30–50%, severe sepsis and septic shock are the major  
44 causes of admission and death in the intensive care unit (ICU). In the United States,  
45 751,000 cases and 215,000 deaths annually are estimated. In Brazil, the incidence is 57

46 per 1000 patients per day and the mortality rates of patients with severe sepsis and  
47 septic shock are 47.3% and 52.2%, respectively [2].

48 Although the symptoms are known, distinguishing the cause of sepsis in patients with  
49 clinical signs of acute inflammation in the emergency room and ICU remains  
50 problematic [3].

51 The early recognition and treatment of sepsis contributes to recovery success  
52 and, consequently, higher survival rates [1]. The presence of certain components in the  
53 pathogen membrane induces the release of specific inflammatory mediators  
54 characterizing the initial phase of sepsis. Biomarkers are able to distinguish between  
55 SIRS and sepsis, and a strategy to monitor the pro- and anti-inflammatory changes  
56 associated with the host response to pathogens [3].

57 In recent years, researchers have consequently attempted to diagnose sepsis early  
58 and change or interrupt its course. However, the poor clinical outcome and/or  
59 continuing high mortality rates of patients with sepsis have not yet resulted in an  
60 immediate or successful solution to this problem.

61 The use of biomarkers has been suggested to assist with early diagnosis;  
62 therefore, it may be an immediate appropriate therapy for patients with sepsis in the  
63 ICU. A biomarker is an indicator of normal biological processes as well as the  
64 pathogenic or pharmacological responses that may lead to a therapeutic intervention  
65 [4].

66 Procalcitonin (PCT) is a biomarker encoded by the *CALC-I* gene located on  
67 chromosome 11. The mRNA is translated into pre-PCT and the product of this  
68 translation is modified in PCT, a 116-amino-acid prohormone that is then converted into  
69 calcitonin, an active 32-amino-acid hormone that is involved in calcium and  
70 phosphorous metabolism [5].

71           In healthy patients, PCT is secreted almost exclusively by thyroid C-cells [5];  
72   under these conditions, the serum PCT concentrations are very low (0.05 ng/mL) [6-7].  
73   In the case of septicemia, particularly when associated with bacteremia, an alternative  
74   pathway for PCT production may become activated that increases its serum levels.  
75   Lung, colon, and spleen tissues can produce PCT in these cases [5]. Levels > 2 ng/mL  
76   indicate susceptibility to developing severe sepsis or septic shock [7].

77           PCT is considered a good clinical marker due to its high specificity and  
78   sensitivity (8), and its serum levels increase within 3 hours, peaking at around 6–12  
79   hours in addition to being highly stable in the serum and plasma [7]. It also has a half-  
80   life of 24–30 hours in the circulation [9].

81           Endogenous nitric oxide (NO) is generated from L-arginine by the action of the  
82   enzyme NO synthase (NOS). The activity of NOS in the oxidation of L-arginine leads  
83   to the production of NO and L-citrulline [10].

84           NOS enzymes are essential to NO production, and three isoforms have been  
85   described: constitutive NOS (cNOS), which can be endothelial (eNOS) or neuronal  
86   (nNOS), both of which are calcium-dependent and inducible NOS (iNOS), which is  
87   calcium-independent [11].

88           Under normal physiological conditions, cNOS is present in endothelial cells,  
89   brain cells, and platelets and synthesizes NO from L-arginine in a calcium- and  
90   NADPH-dependent manner.

91           NO acts as a neurotransmitter when produced by nNOS expressed in the central  
92   and peripheral nervous systems, kidneys, skeletal muscles, myocardium, and pancreas  
93   [11]. It has an important physiological function as a neurotransmitter as well as a  
94   mediator in coupling neural metabolism and cerebral blood flow [10].

95 Not expressed under normal conditions, iNOS is induced by cytokines and/or  
96 endotoxins in several cell types including macrophages, neutrophils, Kupffer cells, and  
97 hepatocytes [12]. Under these conditions, NO is produced from L-arginine by the action  
98 of iNOS [10]. This isoform requires several hours to be expressed, but once  
99 synthesized, it releases larger amounts of NO than eNOS and nNOS and its production  
100 continues indefinitely until L-arginine and/or the co-factors required for its synthesis are  
101 depleted or when cell death occurs [12].

102 The expression of iNOS results in a localized or diffuse inflammatory response  
103 results from infection or tissue damage. High concentrations of NO, which is toxic to  
104 microbes, parasites, and tumor cells, can also harm surrounding healthy cells since this  
105 mechanism is responsible for the majority of inflammatory and autoimmune processes  
106 [12].

107 The first biological function attributed to NO was vasodilation mediation,  
108 although today NO is also believed to have a role in body temperature control during  
109 physiological and pathological conditions [13].

110 The wistar rat is widely used in animal experimental work because it is already  
111 known the anatomy, physiology and behavior of these animals. In addition, this animal  
112 is easy to handle and their physiological and genetic characteristics are similar to  
113 humans [14].

114 The objective of this study was to evaluate arterial blood pressure and the  
115 biomarkers in an experimental model of sepsis. Our hypothesis was that arterial blood  
116 pressure could predict the onset of sepsis via correlation of its value with the biomarkers  
117 involved to acquire a quick and early diagnosis.

## 118 **Material and Methods**

119           The tests were performed on 11 male wistar rats (*Rattus norvegicus*) from the  
120   Unit of Animal Experimental da Universidade Estadual do Norte Fluminense Darcy  
121   Ribeiro, weighing between 250 and 300 grams. They were kept in appropriate cages in  
122   groups of 5 animals, covered with wood shavings. The temperature controlled  
123   environment possessed 19 °C and humidity of 50 to 60%, maintained in light/dark  
124   cycles of 12 hours. Food and water were provided *ad libitum*. At the moment of the  
125   experiment, these animals were placed alone in similar boxes, but smaller, to evaluation  
126   in the recommended times.

127           Anesthesia was delivered with the help of an inhalant mask made from a PET  
128   bottle and held together with a smaller mask produced from a 20 mL syringe and filled  
129   with native lime to minimize the CO<sub>2</sub> rebreathing. The anesthesia was maintained with  
130   halothane throughout the procedure.

131           Invasive arterial blood pressure was measured by cannulation of the carotid  
132   artery in which a heparinized cannula was positioned and fixed in the carotid and fixed  
133   on the skin of the dorsal region of the neck for subsequent evaluations. The cannula was  
134   connected to the sensor of the BioAmp equipment (ADInstruments, São Paulo, Brazil)  
135   that transforms the blood pressure information and amplifies the signal in the form of  
136   graphics for the computer to enable posterior data analysis using LabChart 7 software  
137   (ADInstruments).

138           The animals were randomly divided into control (SHAM) and experimental  
139   groups.

140           In the SHAM group (n = 5), a laparotomy was performed and the cecum was  
141   exposed and returned to the abdominal cavity without causing sepsis. In the  
142   experimental group (n = 6), sepsis was induced in the animals by laparotomy and  
143   exposure of the cecum followed by cecal ligation and puncture (CLP). The cecum was

144 returned to the abdominal cavity, which was closed with non-absorbable nylon 3/0 wire  
145 and simple interrupted sutures.

146 The CLP was performed as described by Witcherman et al. [15] with a slight  
147 modification. The rats were anesthetized with halothane, and a midline abdominal  
148 incision was made to expose the cecum, followed by a loose ligation of the apex of the  
149 cecum that was filled with feces. The cecum was then punctured three times with a  
150 hypodermic needle 40 × 16 and returned to the abdominal cavity to promote fecal  
151 extravasation and result in CLP-induced peritonitis.

152 The animals were evaluated at three time points: immediately after, 2 hours  
153 after, and 4 hours after the induction of sepsis.

154 The evaluation consisted of invasive blood pressure measurement, collection of  
155 1 mL of blood for leukocyte count (WBC) and quantification of PCT and NO using a  
156 Rat Procalcitonin (PCT) Elisa Kit and a Nitric Oxide (NO<sub>2</sub>/NO<sub>3</sub>) Detection Kit. After  
157 each blood collection, the volume was replaced with 0.9% saline solution to minimize  
158 the possible effects of hypovolemia. At the end of the 4-hour evaluation, the animals  
159 were sacrificed.

160 The data were compiled and statistical significance was established using one-way  
161 analysis of variance (ANOVA) followed by the Newman-Keuls test ( $p < 0.05$ ). The data  
162 were analyzed using GraphPad Prism® 5.0.

163 Ethics Statement: This study was submitted to Use Ethics Committee of animals  
164 of the Universidade Estadual do Norte Fluminense by the number 161.

## 165 **Results**

166 The recovery of the anesthetic animals was normal and the tests could be  
167 performed at the indicated time points.

168 In both groups, the animals' WBC counts did not differ significantly, but a pattern  
169 of leukocytosis at time point 2 and leukopenia at time point 3 could be observed (Fig.  
170 1).

171 The PCT values remained very similar between groups with values close to 2  
172 ng/mL (Fig. 2).

173 The NO levels showed progressive but insignificant increases at each time point  
174 in both groups; in the induced group, the increase was even more pronounced (Fig. 3).

175 Systolic arterial blood pressure (SAP) and mean arterial blood pressure (MAP)  
176 values did not differ significantly between groups. However, when comparing diastolic  
177 arterial blood pressure (DAP), a statistically significant increase in DAP was observed  
178 between the animals of the control group at time points 1 and 2 in addition to the  
179 difference between sepsis-induced animals at time points 2 and 3 compared to time  
180 point 1.

## 181 **Discussion**

182 The PCT levels at the different time points in the induced animals did not differ  
183 significantly from the levels of the respective SHAM animals. In this case, the animals  
184 were not considered septic since the values obtained were below or very close to 2  
185 ng/mL. However, the animals were in SIRS at all time points as identified by Arkader  
186 [6] and Liu et al. [7], who defined PCT values of 0.05–2 ng/mL as indicative of this  
187 syndrome.

188 The SHAM animals that underwent only cecum manipulation without CLP also  
189 had elevated PCT levels indicative of SIRS. Since these animals underwent the  
190 cannulation procedure to record the blood pressure, it is possible that these increased  
191 levels of PCT are the result of surgical manipulation as described by Diaz [16] and



192 Soreng et al. [5], who claimed that surgeries, severe trauma, and burns are also capable  
193 of increasing PCT levels.

194 The animals were evaluated for only 4 hours, so it is possible that the PCT  
195 values were not yet at its peak plasma concentration. According to Liu et al. [7], PCT  
196 levels in humans increase over a period of 3 hours and peak at 6–12 hours. The time  
197 frame for this response in rats was estimated to be 4 hours since this species has a  
198 higher metabolic rate than humans. Accordingly, we estimated that the selected time  
199 frame would be sufficient for determining sepsis.

200 The NO levels did not show statistically significant differences between groups,  
201 although it is possible to observe an increase in both SHAM and induced animals since  
202 NO values were even higher in the last group. This demonstrates that surgical  
203 manipulation may also increase the NO plasma levels and that this model for inducing  
204 sepsis was able to increase those levels compared to the SHAM group at the three  
205 evaluated time points. The increase of NO confirms the data described by Vieira [12],  
206 who affirmed that NO levels increase the production of iNOS when there is an  
207 inflammatory involvement resulting from infection or tissue damage.

208 Although there were no statistically significant differences in the SAP and MAP  
209 between the SHAM and sepsis-induced animals, it was clinically possible to observe an  
210 increase in SAP, MAP, and DAP at time point 2. This difference may be due to the fact  
211 that time point 1 was immediately after the surgical procedure, when the animals could  
212 still be recovering from the anesthesia.

213 The maintenance of a stable MBP throughout the entire procedure shows that  
214 despite the connection between NO levels and vasodilation in septic patients, its  
215 increase in circulation did not correlate to the decrease in MAP. It can be inferred that  
216 an increase in NO precedes clinical hypotension in patients. Pereira et al. [13] also did

217 not observe a relation between mean hypotension and NO increase in sepsis, severe  
218 sepsis, or septic shock in dogs.

219 DAP showed an increase between SHAM time points 1 and 2, induced time  
220 points 1 and 2, and induced time points 1 and 3. According to Hajjar et al. [17] the  
221 diastolic dysfunction induced by sepsis is not yet well established but occurs by itself or  
222 in association with systolic dysfunction. The increase in diastolic pressure observed in  
223 this study may be caused by the restriction imposed by the pericardium, which tends to  
224 promote rapid ventricular filling [18].

225 Moreover, Bouhemad et al. [19] evaluated the hearts of patients with septic  
226 shock using Doppler echocardiography and observed a reduced relaxation of the left  
227 ventricle in 20% of 54 patients.

228 Rapid ventricular filling and reduced left ventricular relaxation may have been  
229 decisive factors for the observed increase of DAP. Since cardiac evaluation, troponin  
230 level measurements, and echocardiography were not performed in this case, it is not  
231 possible to confirm that this finding may be explained by the changes mentioned above.

232 Munt et al. [20] also described that more pronounced diastolic changes were  
233 observed in the group of septic patients that did not survive.

## 234 **Conclusions**

235 After the end of the experiment and data analysis, we can conclude that despite  
236 PCT being a recommended biomarker for the diagnosis and prognosis of sepsis, its  
237 production may be increased for other causes such as surgeries and trauma rather than  
238 bacterial infections.

239           The plasma NO concentration may be increased due to surgical manipulation.  
240   Despite the fact that this biomarker promotes vasodilation, it is not related to mean  
241   arterial hypotension.

242           The use of arterial blood pressure as the only method of assessment was not a  
243   good predictor of sepsis onset during the 4-hour study period. The results of diastolic  
244   hypertension found in the present study are not consistent with those found in the  
245   studies that cite hypotension in cases of septic shock.

## 246   **References**

- 247   1. Vanzant AM, Schmelzer M. Detecting and treating sepsis in the emergency  
248   departament. *J Emerg Nurs*. 2011; 37:47-54.
- 249   2. Shiramizo SCPL, Marra AM, Durão MS, Paes AT, Edmond MB, Santos, OFP.  
250   Decreasing mortality in severe sepsis and septic shock patients by implementing a  
251   sepsis bundle in a hospital setting. *PLOS ONE*. 2011; 6:1-6.
- 252   3. Lvovschi V, Arnaud L, Parizot C, Freund Y, Juillien G, Ghillani-Dalbin P, et al.  
253   Cytokine profiles in sepsis have limited relevance for stratifying patients in the  
254   emergency department: a prospective observational study. *PLOS ONE*. 2011; 6:1-13.
- 255   4. Sankar V, Webster NR. Clinical application of sepsis biomarkers. *J Anesth* 2012; 1-  
256   15.
- 257   5. Soreng K, Levy R. Procalcitonin: an emerging biomarker of bacterial sepsis. *Clin*  
258   *Microbiol Newsl*. 2011; 33:171-178.
- 259   6. Arkader R. Avaliação da procalcitonina como marcador de sepse e de choque séptico  
260   em pacientes pediátricos [dissertation]. São Paulo (SP): Universidade de São Paulo;  
261   2004.

- 262 7. Liu YJ, Du P, Rao J. Procalcitonin as a diagnostic and prognostic marker for sepsis  
263 caused by intestinal infection: a case report. *Eur Rev Med Pharmacol Sci.* 2011;  
264 17:1311-1313.
- 265 8. Sener G, Ozgur E, Rad AY, Uzun L, Say R, Denizli A. Rapid real-time detection of  
266 procalcitonin using a microcontact imprinted surface plasmon resonance biosensor.  
267 *Analyst.* 2013; 189:6422-6428.
- 268 9. Patil VK, Morjaria JB, Villers F, Babu SK. Associations between procalcitonin and  
269 markers of bacterial sepsis. *Medicina (Kaunas)* .2012; 48:383-387.
- 270 10. Knobel E. Óxido nítrico e sepse. *Arq Bras Cardiol.* 1996; 67:263-266.
- 271 11. Hauser B, Bracht H, Matejovic M, Radermacher P, Venkatesh B. Nitric oxide  
272 synthase inhibition in sepsis? Lessons learned from large-animal studies. *Anesth Analg.*  
273 2005; 101:488-498.
- 274 12. Vieira PMAO. Participação do óxido nítrico na infecção experimental de cães pelo  
275 *Trypanossoma cruzi*. [dissertation]. Ouro Preto (MG): Universidade Federal de Ouro  
276 Preto; 2007.
- 277 13. Pereira FH, Batalhão ME, Cárnio EC. Correlação entre temperatura corporal,  
278 pressão arterial e concentração plasmática de óxido nítrico em pacientes com sepse.  
279 *Rev. Latino-Am. Enfermagem.* 2014; 22:1-6.
- 280 14. Carvalho GD, Masseno APB, Zanini MS, Zanini SF, Porfírio LC, Machado JP, et al.  
281 Avaliação clínica de ratos de laboratório (*Rattus norvegicus* linhagem Wistar):  
282 parâmetros sanitários, biológicos e fisiológicos. *Revista Ceres.* 2009; 56:51-57,
- 283 15. Wichterman KA, Baue AE, Chaudry IH. Sepsis and septic shock—A review of  
284 laboratory models and a proposal. *Journal of Surgical Research.* 1980; 29:189- 201.
- 285 16. Diaz MMO. Procalcitonina como biomarcador diagnóstico nas doenças infecciosas.  
286 [monograph] Brasília (DF): Universidade de Brasília; 2010.

- 287 17. Hajjar LA, Júnior CJF, Mercon ES, Góis AFT, Knobel L, Lage SG. Disfunção  
288 miocárdica na sepse. Rev Bras Ter Intensiva 2004; 16:185-191.
- 289 18. Lavine SJ, Campbell CA, Gunther SJ. Effect of increased left ventricular size and  
290 filling pressure on diastolic filling. Circulation 1986; 7-11.
- 291 19. Bouhemad B, Nicolas-Robin A, Arbelot C, Arthaud M, Féger F, Rouby JJ. Isolated  
292 and reversible impairment of ventricular relaxation in patients with septic shock. Crit  
293 Care Med 2008; 36:766-774.
- 294 20. Munt B, Jue J, Gin K, Tweeddale M. Diastolic filling in human severe sepsis: an  
295 echocardiographic study. Crit Care Med 1998; 26:1829-1833.

296

297

298

299 **Legends:**

300 **Fig. 1.** Leukocyte counts at the three time evaluated points (M1, immediately after; M2,  
301 2 hours after; and M3, 4 hours after the induction of sepsis) compared with those in the  
302 SHAM group.

303 **Fig. 2.** Procalcitonin concentrations at the three evaluated time points (M1, immediately  
304 after; M2, 2 hours after; and M3, 4 hours after the induction of sepsis) compared with  
305 those in the SHAM group.

306 **Fig. 3.** Released nitric oxide concentrations in SHAM animals and in the experimental  
307 model of induced sepsis at the three evaluated time points (M1, immediately after; M2,  
308 2 hours after; and M3, 4 hours after the induction of sepsis).

309 **Fig. 4.** Changes in the systolic and mean arterial blood pressure in the SHAM and  
310 induced animals at the three evaluated time points (M1, immediately after; M2, 2 hours  
311 after; and M3, 4 hours after the induction of sepsis).

312 **Fig. 5.** Evolution of diastolic arterial blood pressure in SHAM and induced sepsis  
313 animals at the three evaluated time points (M1, immediately after; M2, 2 hours after;  
314 and M3, 4 hours after the induction of sepsis).

315

316

317

bioRxiv preprint doi: <https://doi.org/10.1101/2021.09.24.461714>; this version posted September 24, 2021. The copyright holder for this preprint (which was not certified by peer review) is the author/funder, who has granted bioRxiv a license to display the preprint in perpetuity. It is made available under aCC-BY 4.0 International license.

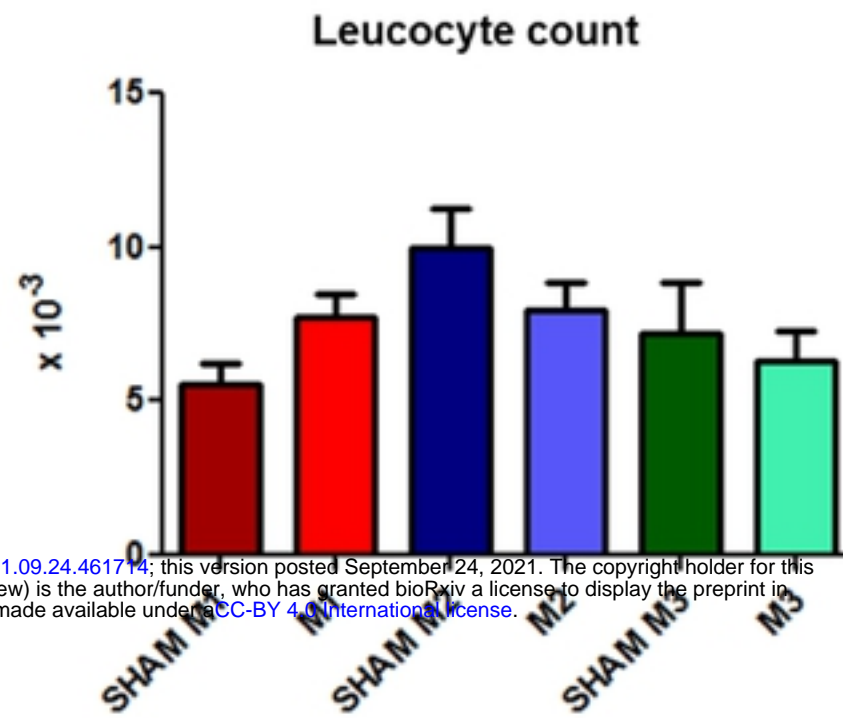

**Fig. 1.** Leukocyte counts at the three time evaluated points (M1, immediately after; M2, 2 hours after; and M3, 4 hours after the induction of sepsis) compared with those in the SHAM group.

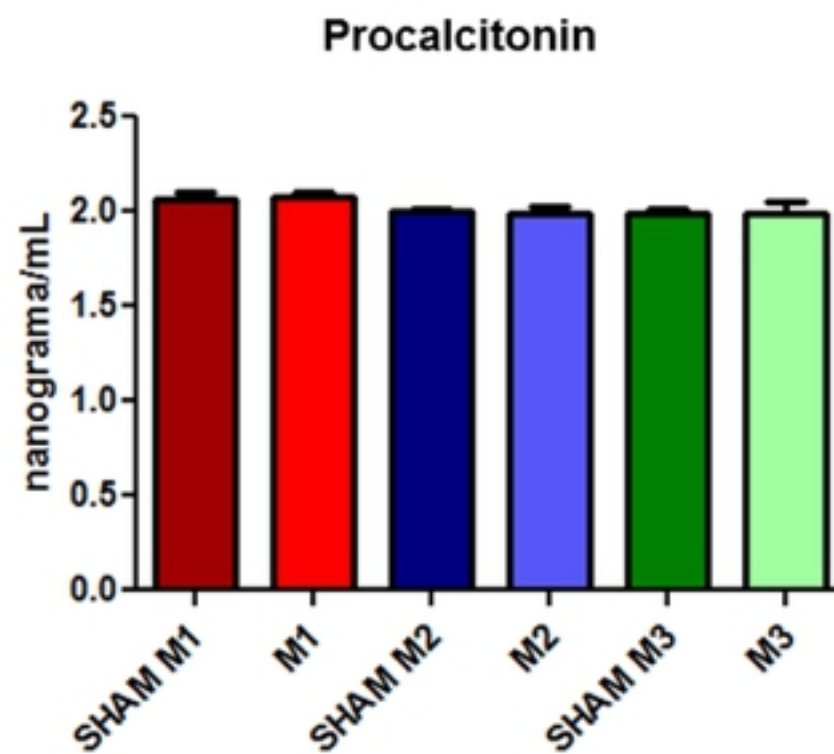

**Fig. 2.** Procalcitonin concentrations at the three evaluated time points (M1, immediately after; M2, 2 hours after; and M3, 4 hours after the induction of sepsis) compared with those in the SHAM group.

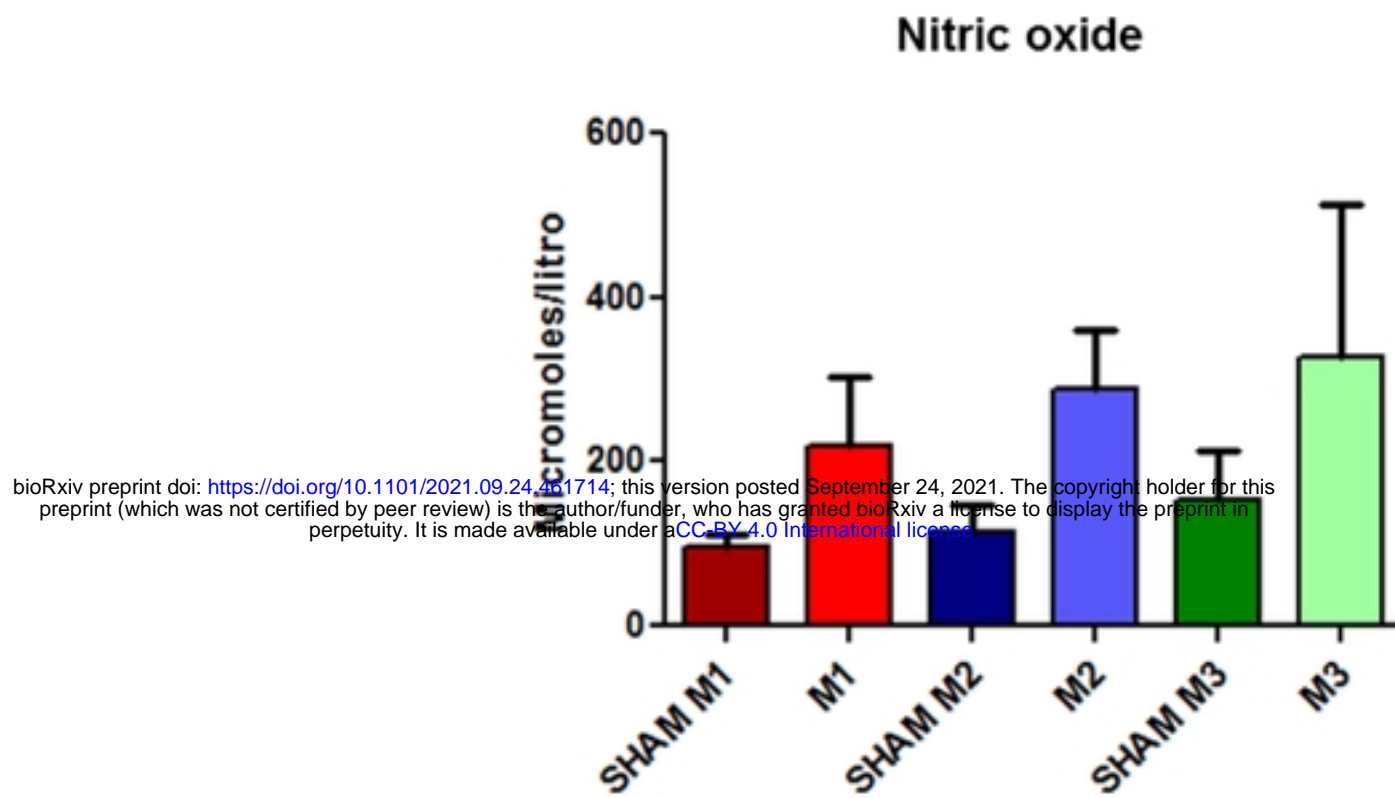

**Fig. 3.** Released nitric oxide concentrations in SHAM animals and in the experimental model of induced sepsis at the three evaluated time points (M1, immediately after; M2, 2 hours after; and M3, 4 hours after the induction of sepsis).



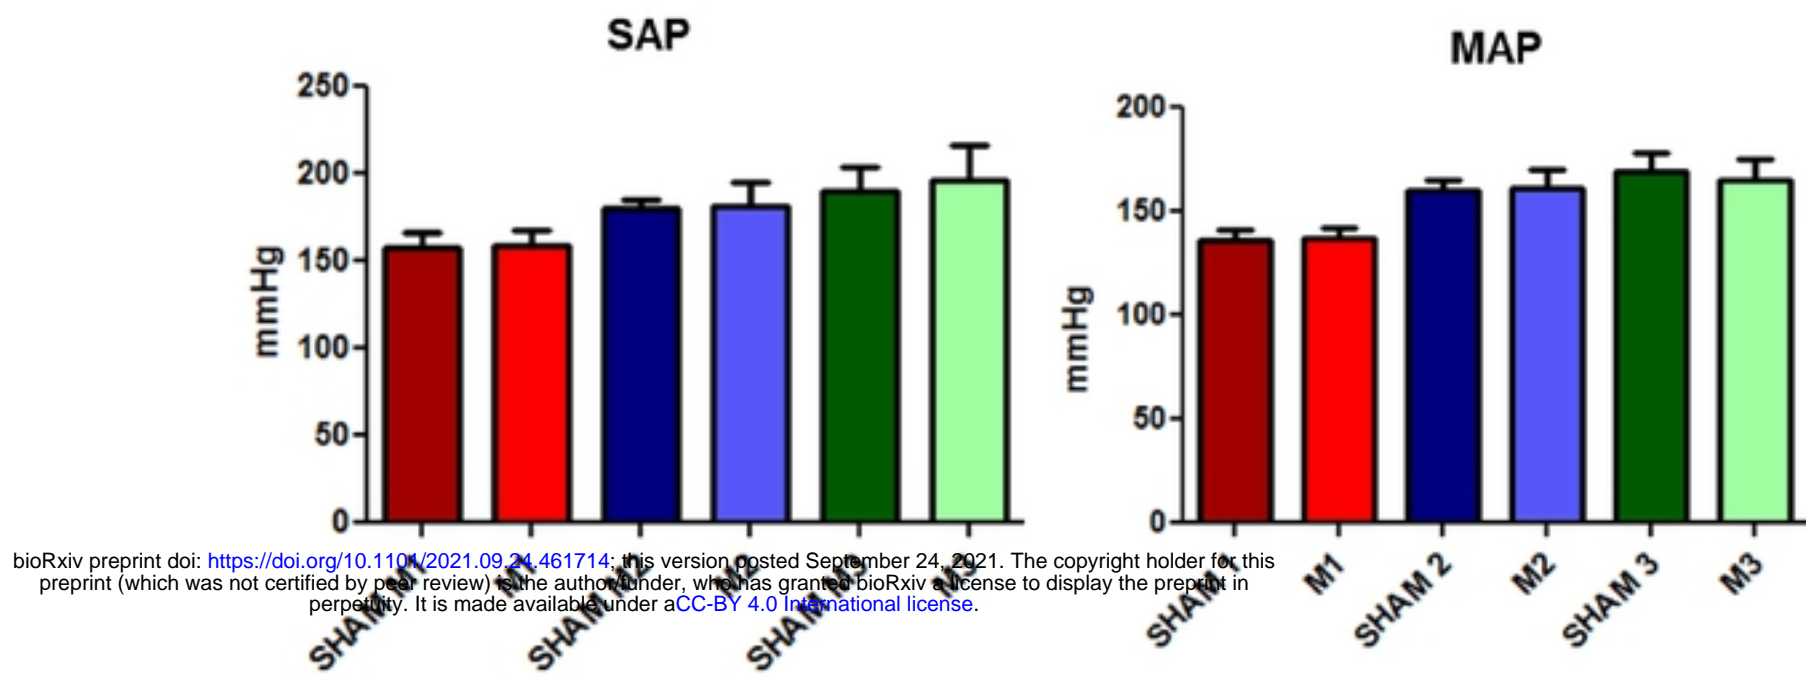

**Fig. 4.** Changes in the systolic and mean arterial blood pressure in the SHAM and induced animals at the three evaluated time points (M1, immediately after; M2, 2 hours after; and M3, 4 hours after the induction of sepsis).

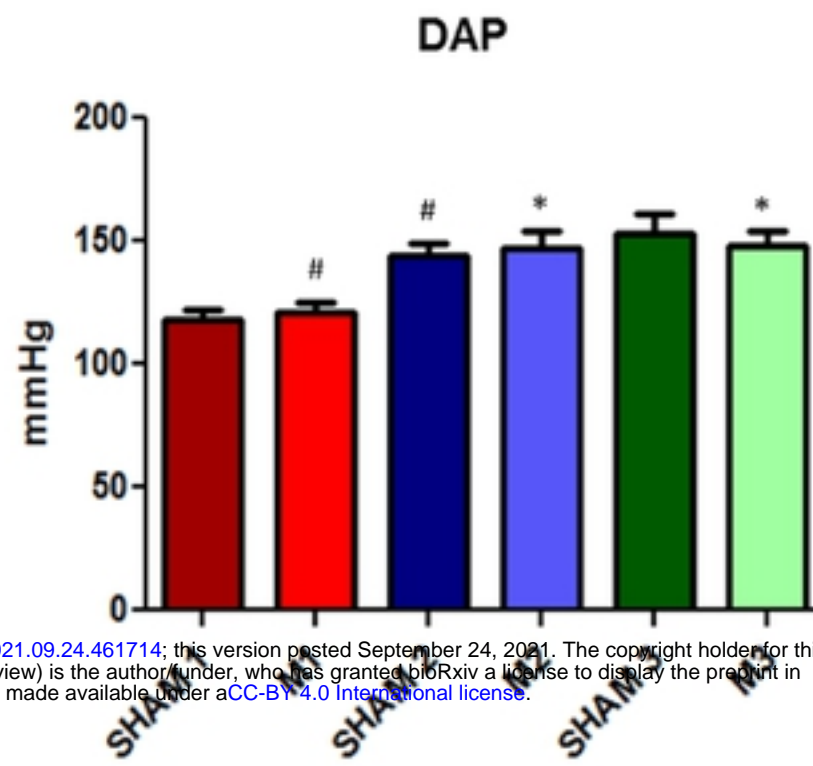

bioRxiv preprint doi: <https://doi.org/10.1101/2021.09.24.461714>; this version posted September 24, 2021. The copyright holder for this preprint (which was not certified by peer review) is the author/funder, who has granted bioRxiv a license to display the preprint in perpetuity. It is made available under aCC-BY 4.0 International license.

**Fig. 5.** Evolution of diastolic arterial blood pressure in SHAM and induced sepsis animals at the three evaluated time points (M1, immediately after; M2, 2 hours after; and M3, 4 hours after the induction of sepsis).
